# Supplementary material for: Calcium Peroxide Promoted Anaerobic Co-digestion of Plant Waste and Excess Sludge to Produce Methane
Source: Research Square preprint supplement (doi:10.21203/rs.3.rs-339830/v1), 2021-03-23
Supplement: Supplementary file 1 [file 33b080e3d80362d5862161ce.docx]

**Supporting Information**

**Calcium peroxide promoted anaerobic co-digestion of plant waste and excess sludge to produce methane**

Yongliang Wang 1, Xiaohui Zhou 2, Bin Dai 3, Xiaoqiang Zhu 1

1.Jiangsu Vocational College of Urban and Rural Construction, College of public utilities, Changzhou, Jiangsu, 213147;

2.Hebei Agricultural University, College of landscape and tourism, Baoding, Hebei, 071001;

3. Suzhou Yuanke Ecological Construction Group Co., Ltd., Suzhou, Jiangsu, 215123;

Corresponding author: Yongliang Wang

E-mail: wangyongliang017@sina.com

Fig. S1The change of pH in the co-digestion of PW and ES system in the presence of CP. Error bars represent standard deviations of triplicate tests.

Fig.S2 Effect of CP on VFA components produced from anaerobic co-digestion of PW and ES. Error bars represent standard deviations of triplicate tests.

Table S1 Variance analysis of methane production compared with R1.

|  | F | P-value | F crit |
| --- | --- | --- | --- |
| R2 | 2283 | 9.37 E-15 | 3.47 |
| R3 | 6231 | 1.49 E-7 | 7.71 |
| R4 | 5850 | 1.75 E-7 | 7.73 |
